# Supplementary material for: Hydroxylated di- and tri-styrylbenzenes, a new class of antiplasmodial agents: discovery and mechanism of action
Source: Royal Society of Chemistry journal article supplement (doi:10.1039/c6ra06059e), 2016-01-01
Supplement: c6ra06059e1.pdf [file c6ra06059e1.pdf]

## Supplementary Information

### Hydroxylated Di- and Tri-styrylbenzenes a New Class of Antiplasmodial Agents: Discovery and Mechanism of Action†

Naina Sharma,<sup>a,b</sup> Dinesh Mohanakrishnan,<sup>c</sup> Amit Shard,<sup>a</sup> Abhishek Sharma,<sup>a,b</sup> Arun K. Sinha<sup>\*a,d</sup>

and Dinkar Sahal<sup>\*, c</sup>

<sup>a</sup>Natural Plant Products Division, CSIR-Institute of Himalaya Bioresource Technology, Palampur (H.P.)-176061, India. Email: aksinha08@rediffmail.com

<sup>b</sup> Department of Chemistry, University of Illinois at Urbana-Champaign, Urbana, Illinois 61801, United States

<sup>c</sup>Research Laboratory, International Centre for Genetic Engineering and Biotechnology, Aruna Asaf Ali Marg, New Delhi 110067, India

<sup>d</sup>Present address: Medicinal Process Chemistry, C.S.I.R-Central Drug Research institute (C.D.R.I.), Lucknow 226031, India. Email: ak.sinha@cdri.res.in

## **Spectral data of other compounds**

### **Spectral data of compound 2-8<sup>1-2, 4-5</sup> (Table 1):**

#### **(E)-4-(4-methoxystyryl)phenol (2)**

Creamish solid (50% yield), m.p. 130-132°C, <sup>1</sup>H NMR δ (CDCl<sub>3</sub>, 300 MHz), 7.44 (2H, d, *J*= 8.5 Hz), 7.32 (2H, t, *J*= 7.9 Hz), 7.13 (1H, s), 7.10 (1H, d, *J*= 16.3 Hz), 7.06 (1H, s), 6.98 (1H, d, *J*= 16.3 Hz), 6.88 (2H, d, *J*= 8.5 Hz), 5.90 (1H, s), 3.87 (3H, s); <sup>13</sup>C NMR δ (75.4 MHz, CDCl<sub>3</sub>), 159.5, 147.6, 134.9, 130.6, 130.0, 129.7, 127.8, 126.8, 114.5, 103.5 and 55.7

#### **(E)-2-methoxy-4-(4-methoxystyryl)phenol (3)**

White solid (56% yield), m.p. 164-167°C (lit. m.p. 163-166°C), <sup>1</sup>H NMR δ (CDCl<sub>3</sub>, 300 MHz) 7.37 (2H, d, *J*= 8.48 Hz), 6.95-6.92 (2H, m), 6.84-6.81 (5H, m), 3.88 (3H, s), 3.76 (3H, s); <sup>13</sup>C NMR δ (75.4 MHz, CDCl<sub>3</sub>) 159.0, 146.7, 145.2, 130.3, 127.4, 126.6, 126.1, 120.1, 118.6, 114.5, 114.1, 108.0, 55.9 and 55.3.

#### **(E)-4-(2-(benzo[d][1,3]dioxol-5-yl)vinyl)-2-methoxyphenol (4)**

White solid (50% yield), m.p. 153-156°C, <sup>1</sup>H NMR (CD<sub>3</sub>COCD<sub>3</sub>, 300 MHz), δ (ppm) 7.63 (1H, s), 7.10 (2H, d, *J*= 19.3 Hz), 6.97-6.91 (4H, m), 6.79 (2H, d, *J*= 8.0 Hz), 5.96 (2H, s), 3.85 (3H, s); <sup>13</sup>C NMR (75.4 MHz, CD<sub>3</sub>COCD<sub>3</sub>), δ (ppm) 148.3, 147.7, 147.0, 146.5, 132.5, 129.7, 127.1, 125.6, 120.9, 120.0, 115.0, 109.1, 108.2, 105.0, 100.8 and 55.3.

#### **(E)-2-methoxy-4-(3,4,5-trimethoxystyryl)phenol (5)**

White solid (45% yield), m.p. 123-125°C, <sup>1</sup>H NMR δ (CDCl<sub>3</sub>, 300 MHz), 7.05-7.02 (2H, m), 6.94 (3H, d, *J*= 8.3 Hz), 6.73 (2H, s), 5.80 (1H, s), 3.95 (3H, s), 3.93 (6H, s), 3.89 (3H, s); <sup>13</sup>C NMR δ (75.4 MHz, CDCl<sub>3</sub>), 153.8, 147.2, 146.0, 138.1, 133.8, 130.3, 128.3, 126.8, 120.8, 115.0, 108.7, 103.8, 61.3, 56.2 and 56.3.

**(E)-2,6-dimethoxy-4-(4-methoxystyryl)phenol (6)**

White solid (54% yield), m.p. 96-98°C, <sup>1</sup>H NMR (CDCl<sub>3</sub>, 300 MHz), δ (ppm) 7.46 (2H, d, *J* = 6.9 Hz), 6.98-6.90 (4H, m), 6.75 (2H, s), 5.60 (1H, s), 3.96 (6H, s), 3.85 (3H, s); <sup>13</sup>C NMR (75.4 MHz, CDCl<sub>3</sub>), δ (ppm) 159.2, 147.3, 134.6, 130.3, 129.4, 127.5, 126.9, 126.5, 114.2, 103.2, 56.4 and 55.4.

**(E)-4-(4-fluorostyryl)-2-methoxyphenol (7)**

White solid (59% yield), m.p. 128-130°C, <sup>1</sup>H NMR (CDCl<sub>3</sub>, 300 MHz), δ (ppm) 7.47 (2H, t, *J* = 6.0 Hz), 7.07-7.03 (4H, m), 6.93-6.90 (3H, m), 5.70 (1H, s), 3.95 (3H, s); <sup>13</sup>C NMR (75.4 MHz, CDCl<sub>3</sub>), δ (ppm) 147.1, 146.1, 134.2, 130.2, 128.9, 127.6, 120.8, 116.1, 115.8, 115.0, 108.6 and 56.3.

**(E)-4-(4-chlorostyryl)-2-methoxyphenol (8)**

White solid (60% yield), m.p. 119-122°C (lit. m.p. 121-124), <sup>1</sup>H NMR (CDCl<sub>3</sub>, 300 MHz), δ (ppm) 7.32 (2H, d, *J* = 8.4 Hz), 7.23 (2H, d, *J* = 8.4 Hz), 6.97-6.93 (3H, m), 6.86-6.82 (2H, m), 5.70 (1H, s), 3.86 (3H, s); <sup>13</sup>C NMR (75.4 MHz, CDCl<sub>3</sub>), δ (ppm) 147.0, 146.2, 136.7, 132.8, 129.8, 129.5, 128.8, 127.7, 125.7, 120.9, 114.9, 108.7 and 55.9.

**(E)-4-(4-bromostyryl)-2,6-dimethoxyphenol (10)**

White solid (42% yield), m.p. 130-133°C, <sup>1</sup>H NMR δ (CDCl<sub>3</sub>, 300MHz), 7.49 (2H, d, *J*= 8.3 Hz), 7.38 (2H, d, *J*= 8.3 Hz), 7.05 (2H, dd, *J*= 8.5 Hz ), 6.76 (2H, s), 5.63 (1H, s), 3.96 (6H, s); <sup>13</sup>C NMR δ (75.4 MHz, CDCl<sub>3</sub>), 147.6, 136.8, 135.5, 132.2, 130.0, 129.0, 128.1, 125.9, 121.3, 103.9 and 56.7. HRMS-ESI: m/z [M+H]<sup>+</sup> for C<sub>16</sub>H<sub>16</sub>BrO<sub>3</sub>, calculated 335.0283; observed 335.0160.

## Spectral data of compound **12**<sup>6</sup>, **13**-**19**<sup>4</sup> (Table 1):

### **4,4'-((1E,1'E)-1,4-phenylenebis(ethene-2,1-diyl))bis(benzene-1,2-diol) (12)**

Grey solid (54% yield), m.p. 380-382°C, <sup>1</sup>H NMR (CD<sub>3</sub>COCD<sub>3</sub>: DMSO-d<sub>6</sub> (7:3), 300 MHz), δ (ppm) 8.91 (4H, s), 7.51 (4H, s), 7.12 (1H, s), 7.06 (4H, s), 6.96 (1H, s), 6.91 (2H, d, *J* = 10.2 Hz), 6.78 (2H, d, *J* = 10.2 Hz); <sup>13</sup>C NMR (75.4 MHz, CD<sub>3</sub>COCD<sub>3</sub>: DMSO-d<sub>6</sub> (7:3), δ (ppm) 146.9, 146.3, 137.1, 129.7, 129.1, 127.0, 125.4, 119.3, 116.3 and 113.9.

### **4,4'-((1E,1'E)-1,4-phenylenebis(ethene-2,1-diyl))bis(2-methoxyphenol) (13)**

Grey solid (68% yield), m.p. 266-270°C, <sup>1</sup>H NMR (DMSO-d<sub>6</sub>, 300 MHz), δ (ppm) 9.16 (2H, s), 7.52 (4H, s), 7.20 (2H, s), 7.18-7.02 (4H, d, *J* = 13.5 Hz), 7.01 (2H, d, *J* = 8.2 Hz), 6.79 (2H, d, *J* = 8.2 Hz), 3.83 (6H, s); <sup>13</sup>C NMR (75.4 MHz, DMSO-d<sub>6</sub>), δ (ppm) 148.3, 147.1, 136.7, 129.2, 128.8, 127.4, 125.5, 120.6, 116.8, 110.2 and 55.3. HRMS-ESI: *m/z* [M+H]<sup>+</sup> for C<sub>24</sub>H<sub>22</sub>O<sub>4</sub>, calculated 375.1591; observed 375.1591.

### **4,4'-((1E,1'E)-1,4-phenylenebis(ethene-2,1-diyl))bis(2,6-dimethoxyphenol) (14)**

Greenish brown solid (67% yield), m.p. 246-250°C, <sup>1</sup>H NMR (DMSO-d<sub>6</sub>, 300 MHz), δ (ppm) 8.45 (2H, s), 7.46 (4H, s), 7.06 (2H, d, *J* = 16.4 Hz), 7.05 (2H, d, *J* = 16.4 Hz), 6.82 (4H, s), 3.74 (12H, s); <sup>13</sup>C NMR (75.4 MHz, DMSO-d<sub>6</sub>), δ (ppm) 148.6, 136.8, 136.3, 129.1, 128.1, 125.9, 124.6, 104.7 and 55.7. HRMS-ESI: *m/z* [M+H]<sup>+</sup> for C<sub>26</sub>H<sub>26</sub>O<sub>6</sub>, calculated 435.1802; observed 435.1828.

### **4,4'-((1E,1'E)-(2-fluoro-1,4-phenylene)bis(ethene-2,1-diyl))bis(2,6-dimethoxyphenol) (15)**

Yellow solid (46% yield), m.p. 225-227°C, <sup>1</sup>H NMR (CD<sub>3</sub>COCD<sub>3</sub>, 300 MHz), δ (ppm) 7.72 (1H, t, *J* = 8.0 Hz), 7.49 (2H, s), 7.38-7.32 (2H, m), 7.27-7.21 (3H, m), 7.15 (1H, s), 6.96 (4H, s), 3.89 (12H, s); <sup>13</sup>C NMR (75.4 MHz, CD<sub>3</sub>COCD<sub>3</sub>), δ (ppm) 148.8, 139.6, 139.5, 137.3, 132.0,

131.0, 129.0, 128.7, 127.7, 125.3, 124.7, 123.2, 118.4, 113.3, 113.0, 105.1 and 56.5. HRMS-ESI:  $m/z$   $[M+H]^+$  for  $C_{26}H_{25}O_6F$ , calculated 453.1708; observed 453.1705.

**4,4'-((1*E*,1'*E*)-(2,5-difluoro-1,4-phenylene)bis(ethene-2,1-diyl))bis(2,6-dimethoxyphenol) (16)**

Yellowish green solid (19% yield), m.p. 229-232°C,  $^1H$  NMR (DMSO, 300 MHz),  $\delta$  (ppm) 8.7 (2H, s), 7.59 (2H, t,  $J = 9.3$  Hz), 7.29 (2H, d,  $J = 16.6$  Hz), 7.08 (2H, d,  $J = 16.6$  Hz), 6.91 (4H, s), 3.83 (12H, s);  $^{13}C$  NMR (75.4 MHz, DMSO),  $\delta$  (ppm) 148.1, 136.5, 132.8, 130.9, 127.1, 116.3, 112.7, 104.6 and 56.0. HRMS-ESI:  $m/z$   $[M+H]^+$  for  $C_{26}H_{24}O_6F_2$ , calculated 471.1614; observed 471.1613.

**4,4'-((1*E*,1'*E*)-(2,5-dimethoxy-1,4-phenylene)bis(ethene-2,1-diyl))bis(2,6-dimethoxyphenol) (17)**

Yellowish green solid (50% yield), m.p. 245-248°C,  $^1H$  NMR (DMSO- $d_6$ , 300 MHz),  $\delta$  (ppm) 9.17 (2H, s), 7.24-7.21 (6H, d,  $J = 10.4$  Hz), 7.13 (2H, s), 7.00 (2H, s), 6.79 (2H, s), 3.89 (6H, s), 3.84 (6H, s);  $^{13}C$  NMR (75.4 MHz, DMSO- $d_6$ ),  $\delta$  (ppm) 150.7, 147.7, 146.5, 129.1, 125.6, 119.6, 115.7, 110.0, 108.8, 56.0 and 55.5. HRMS-ESI:  $m/z$   $[M+H]^+$  for  $C_{26}H_{26}O_6$ , calculated 435.1802; observed 435.1800.

**4,4'-((1*E*,1'*E*)-anthracene-9,10-diylbis(ethene-2,1-diyl))bis(2,6-dimethoxyphenol) (18)**

Brown solid (14% yield), m.p. 212-216°C,  $^1H$  NMR (DMSO- $d_6$ , 300 MHz),  $\delta$  (ppm) 8.62 (2H, s), 8.43 (4H, d,  $J = 6.4$  Hz), 8.03 (2H, d,  $J = 16.2$  Hz), 7.57-7.54 (4H, d,  $J = 7.3$  Hz), 7.11 (4H, s), 6.84 (2H, d,  $J = 16.2$  Hz), 3.87 (12H, s);  $^{13}C$  NMR (75.4 MHz, DMSO- $d_6$ ),  $\delta$  (ppm) 148.2, 137.7, 136.0, 132.3, 129.0, 127.4, 126.3, 125.3, 121.8, 104.5 and 56.1. HRMS-ESI:  $m/z$   $[M+H]^+$  for  $C_{34}H_{30}O_6$ , calculated 535.2115; observed 535.2123.

**4,4'-((1*E*,1'*E*)-[1,1'-biphenyl]-4,4'-diylbis(ethene-2,1-diyl))bis(2,6-dimethoxyphenol) (19)**

Yellowish brown solid (62% yield), m.p. 277-280°C, <sup>1</sup>H NMR (DMSO-d<sub>6</sub>, 300 MHz), δ (ppm) 8.58 (2H, s), 7.74 (4H, d, *J* = 7.6 Hz), 7.65 (4H, d, *J* = 7.6 Hz), 7.19 (4H, s), 6.93 (4H, s), 3.83 (12H, s); <sup>13</sup>C NMR (75.4 MHz, DMSO-d<sub>6</sub>), δ (ppm) 148.1, 138.0, 136.6, 135.8, 129.1, 127.5, 126.6, 125.1, 104.2 and 56.0. HRMS-ESI: m/z [M+H]<sup>+</sup> for C<sub>32</sub>H<sub>30</sub>O<sub>6</sub>, calculated 511.2115; observed 511.2141.

**Spectral data of compound 21-22<sup>3</sup>, 23<sup>6</sup> 24-26<sup>3</sup> (Table 1):**

**4-((*E*)-4-((*E*)-4-hydroxystyryl)styryl)-2-methoxyphenol (21)**

Yellow green solid, m. p. 255-257°C, <sup>1</sup>H NMR (DMSO-d<sub>6</sub>:CDCl<sub>3</sub> (1.0: 1.0), 300 MHz), δ (ppm) 9.35 (1H, s), 8.87 (1H, s), 7.49 (4H, s), 7.40 (2H, d, *J* = 8.2 Hz), 7.10 (3H, d, *J* = 17.6 Hz), 7.00-6.96 (3H, m), 6.93 (1H, d, *J* = 7.3 Hz), 6.87 (2H, t, *J* = 8.2 Hz), 3.94 (3H, s); <sup>13</sup>C NMR (75.4 MHz, (DMSO-d<sub>6</sub>:CDCl<sub>3</sub> (1.0: 1.0), δ (ppm) 156.8, 147.1, 146.8, 135.6, 134.8, 128.2, 127.6, 127.5, 127.0, 125.6, 124.5, 124.2, 119.5, 115.0, 114.9, 108.6 and 55.1. HRMS-ESI: m/z [M+H]<sup>+</sup> for C<sub>23</sub>H<sub>20</sub>O<sub>3</sub>, calculated 345.1485; observed 345.1436.

**4-((*E*)-4-((*E*)-4-hydroxystyryl)styryl)-2,6-dimethoxyphenol (22)**

Light brown solid, m. p. 180-182°C, <sup>1</sup>H NMR (DMSO-d<sub>6</sub>, 300 MHz), δ (ppm) 9.61 (1H, s), 8.54 (1H, s), 7.53 (4H, s), 7.44 (2H, d, *J* = 7.7 Hz), 7.19 (3H, d, *J* = 16.6 Hz), 7.03 (1H, d, *J* = 16.6 Hz), 6.98 (2H, s), 6.79 (2H, d, *J* = 7.5 Hz), 3.82 (6H, s); <sup>13</sup>C NMR (75.4 MHz, DMSO-d<sub>6</sub>), δ (ppm) 158.2, 149.0, 137.2, 137.1, 136.6, 129.5, 129.0, 128.9, 128.7, 128.5, 127.2, 126.3, 125.7, 116.4, 105.1 and 56.9. HRMS-ESI: m/z [M+H]<sup>+</sup> for C<sub>24</sub>H<sub>22</sub>O<sub>4</sub>, calculated 375.1590; observed 375.1532.

**4-((*E*)-4-((*E*)-4-hydroxy-3-methoxystyryl)styryl)benzene-1,2-diol (23)**

Light green solid (38% yield), m.p. 238-240°C, <sup>1</sup>H NMR (CDCl<sub>3</sub>: DMSO-d<sub>6</sub> (7:3), 300 MHz), δ (ppm) 8.0 (1H, s), 7.85 (1H, s), 7.83 (1H, s), 7.28 (1H, d, *J* = 8.6 Hz), 7.24 (3H, s), 7.17-7.18

(1H, m), 6.85 (2H, s), 6.80 (1H, s), 6.74 (2H, d,  $J = 5.1$  Hz), 6.69 (2H, d,  $J = 5.5$  Hz), 6.65 (2H,  $J = 5.5$  Hz), 3.73 (3H, s);  $^{13}\text{C}$  NMR (75.4 MHz,  $\text{CDCl}_3$ :  $\text{DMSO-d}_6$  (7:3),  $\delta$  (ppm) 147.9, 146.8, 145.3, 136.6, 129.6, 128.8, 128.6, 128.5, 126.7, 125.8, 125.6, 124.7, 124.1, 120.5, 119.4, 119.2, 115.9, 115.7, 113.4, 109.3 and 56.2.

#### **4-((*E*)-4-((*E*)-4-hydroxy-3,5-dimethoxystyryl)styryl)benzene-1,2-diol (24)**

Yellow solid, m. p. 102-104°C,  $^1\text{H}$  NMR ( $\text{CD}_3\text{COCD}_3$ , 300 MHz),  $\delta$  (ppm) 8.03 (1H, s), 7.54 (4H, s), 7.48 (2H, s), 7.16-7.10 (4H, m), 7.02-6.95 (3H, m), 6.85 (1H, d,  $J = 8.1$  Hz), 3.89 (6H, s);  $^{13}\text{C}$  NMR (75.4 MHz,  $\text{CD}_3\text{COCD}_3$ ),  $\delta$  (ppm) 161.7, 149.4, 146.7, 138.2, 138.1, 137.6, 131.3, 130.1, 129.8, 127.8, 127.1, 126.7, 120.5, 116.8, 114.3, 105.6 and 57.1. HRMS-ESI:  $m/z$   $[\text{M}+\text{H}]^+$  for  $\text{C}_{24}\text{H}_{22}\text{O}_5$ , calculated 391.1540; observed 391.1538.

#### **4-((*E*)-4-((*E*)-4-hydroxy-3-methoxystyryl)styryl)-2,6-dimethoxyphenol (25)**

Creamish solid, m. p. 190-192°C,  $^1\text{H}$  NMR ( $\text{CDCl}_3$ , 300 MHz),  $\delta$  (ppm) 7.49 (4H, s), 7.28 (1H, s), 7.11-7.04 (4H, m), 7.00 (1H, s), 6.94 (1H, d,  $J = 8.1$  Hz), 6.78 (2H, s), 5.69 (1H, s), 5.60 (1H, s), 3.97 (9H, s);  $^{13}\text{C}$  NMR (75.4 MHz,  $\text{CDCl}_3$ ),  $\delta$  (ppm) 147.6, 147.1, 146.9, 137.2, 137.1, 129.9, 129.5, 129.1, 128.9, 128.8, 126.9, 120.9, 115.0, 108.6, 103.7, 56.7 and 55.9. HRMS-ESI:  $m/z$   $[\text{M}+\text{H}]^+$  for  $\text{C}_{25}\text{H}_{24}\text{O}_5$ , calculated 405.1696; observed 405.1679.

#### **2,6-dimethoxy-4-((*E*)-4-((*E*)-styryl)styryl)phenol (26)**

Creamish solid, m. p. 162-164°C,  $^1\text{H}$  NMR ( $\text{CDCl}_3$ , 300 MHz),  $\delta$  (ppm) 7.56 (7H, d,  $J = 11.2$  Hz), 7.41 (2H, t,  $J = 7.5$  Hz), 7.14 (2H, s), 7.10 (2H, q,  $J = 16.2$  Hz), 6.79 (2H, s), 5.62 (1H, s), 3.97 (6H, s);  $^{13}\text{C}$  NMR (75.4 MHz,  $\text{CDCl}_3$ ),  $\delta$  (ppm) 147.6, 137.7, 137.2, 136.8, 135.3, 129.4, 129.1, 128.8, 128.7, 128.0, 127.3, 127.0, 126.9, 103.8 and 56.7.

## NMR spectra of novel compounds

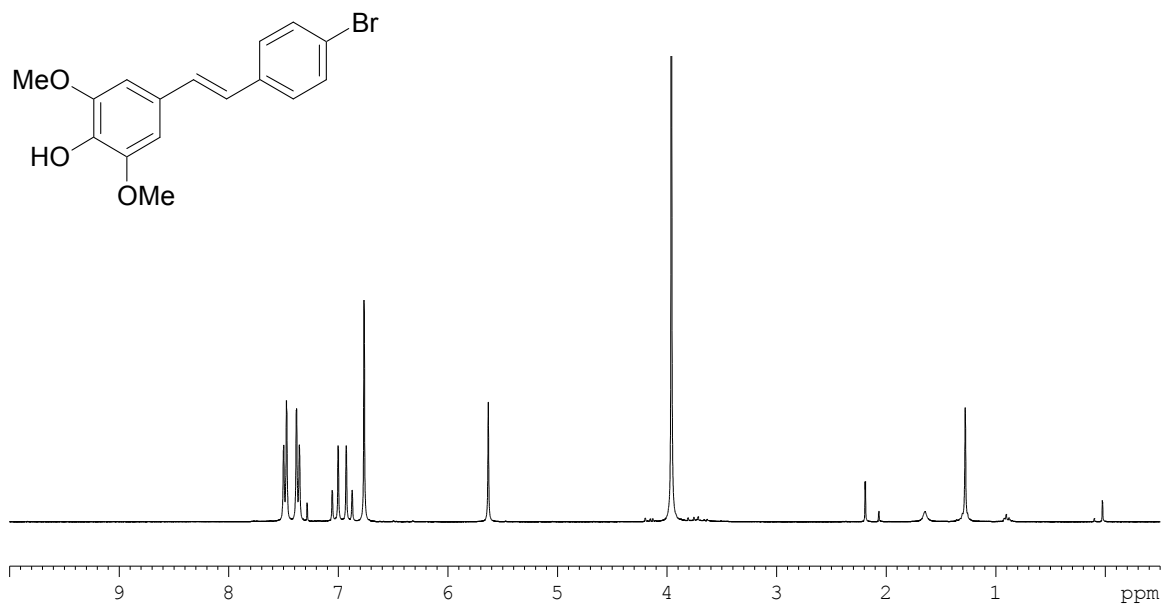

<sup>1</sup>H NMR (in CDCl<sub>3</sub>) spectrum of *(E)*-4-(4-bromostyryl)-2,6-dimethoxyphenol (**10**)

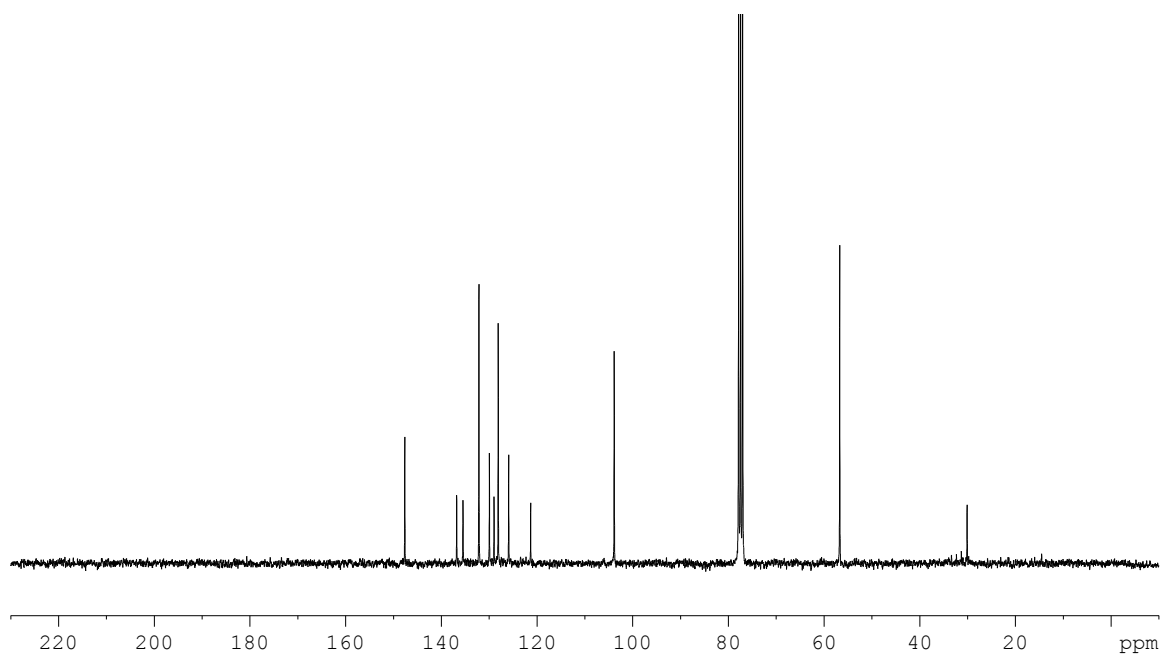

<sup>13</sup>C NMR (in CDCl<sub>3</sub>) spectrum of *(E)*-4-(4-bromostyryl)-2,6-dimethoxyphenol (**10**)



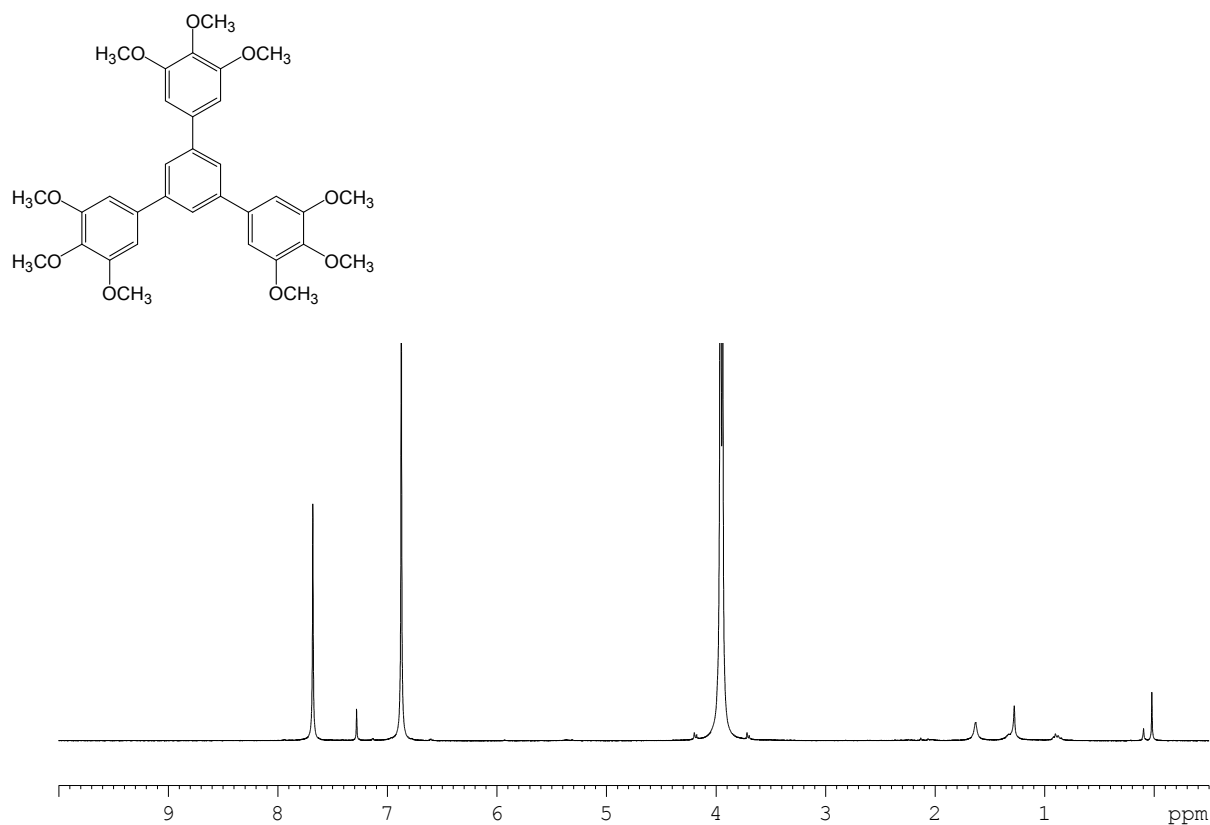

<sup>1</sup>H NMR (in CDCl<sub>3</sub>) spectrum of 3,3'',4,4'',5,5''-hexamethoxy-5'-(3,4,5-trimethoxyphenyl)-1,1':3',1''-terphenyl (**28**)

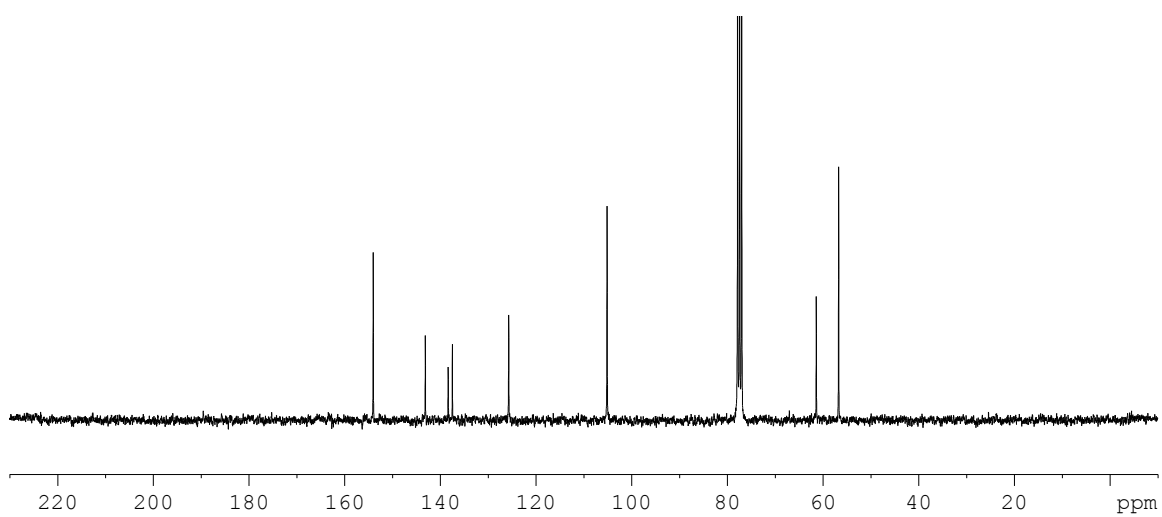

<sup>13</sup>C NMR (in CDCl<sub>3</sub>) spectrum of 3,3'',4,4'',5,5''-hexamethoxy-5'-(3,4,5-trimethoxyphenyl)-1,1':3',1''-terphenyl (**28**)

Microscopic studies of Hydroxylated Distyrylbenzene 11, and Octupolar Stilbenoid 27, in malaria parasite

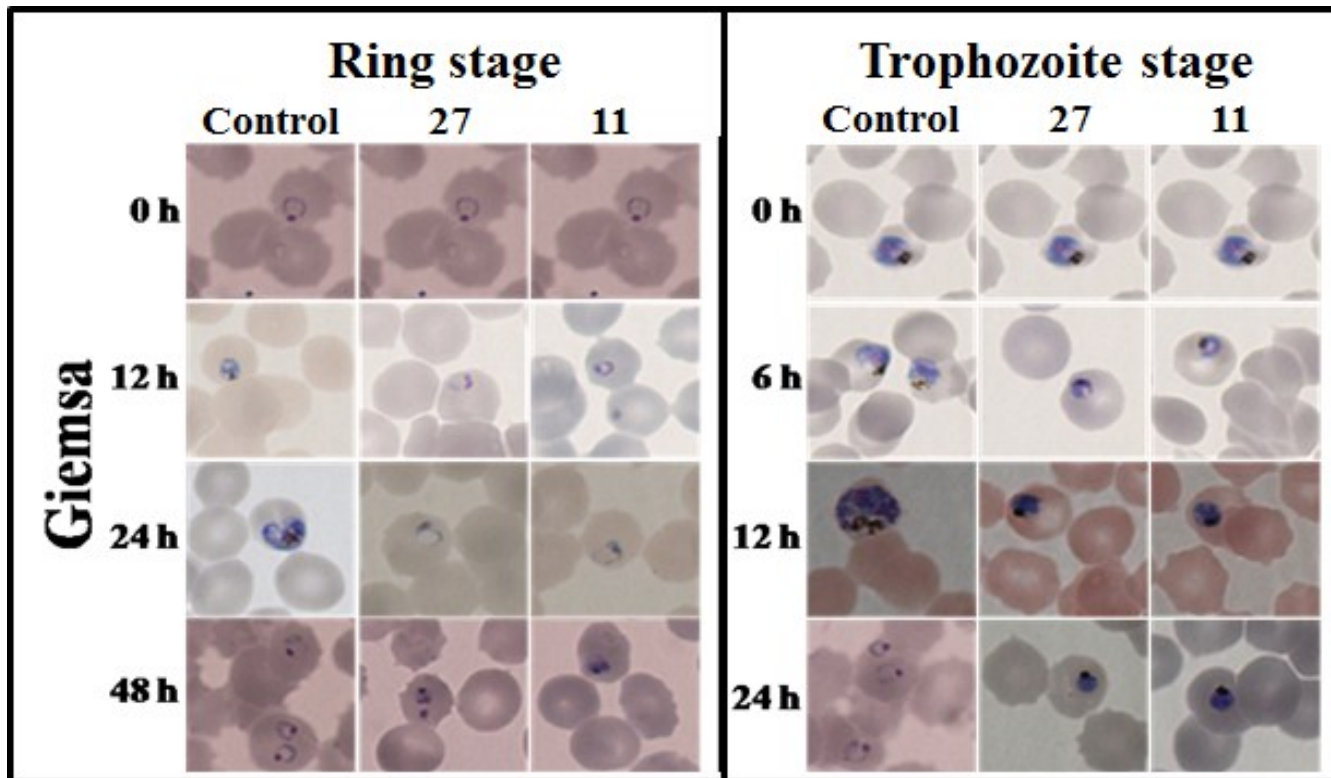

**Figure S1a:** Giemsa staining showed stressed and shrunken “crisis forms in 27 & 11 treated cultures. Drug treated ring and trophozoite stages lagged behind their respective controls in terms of ring to trophozoite and trophozoite to schizont transitions.

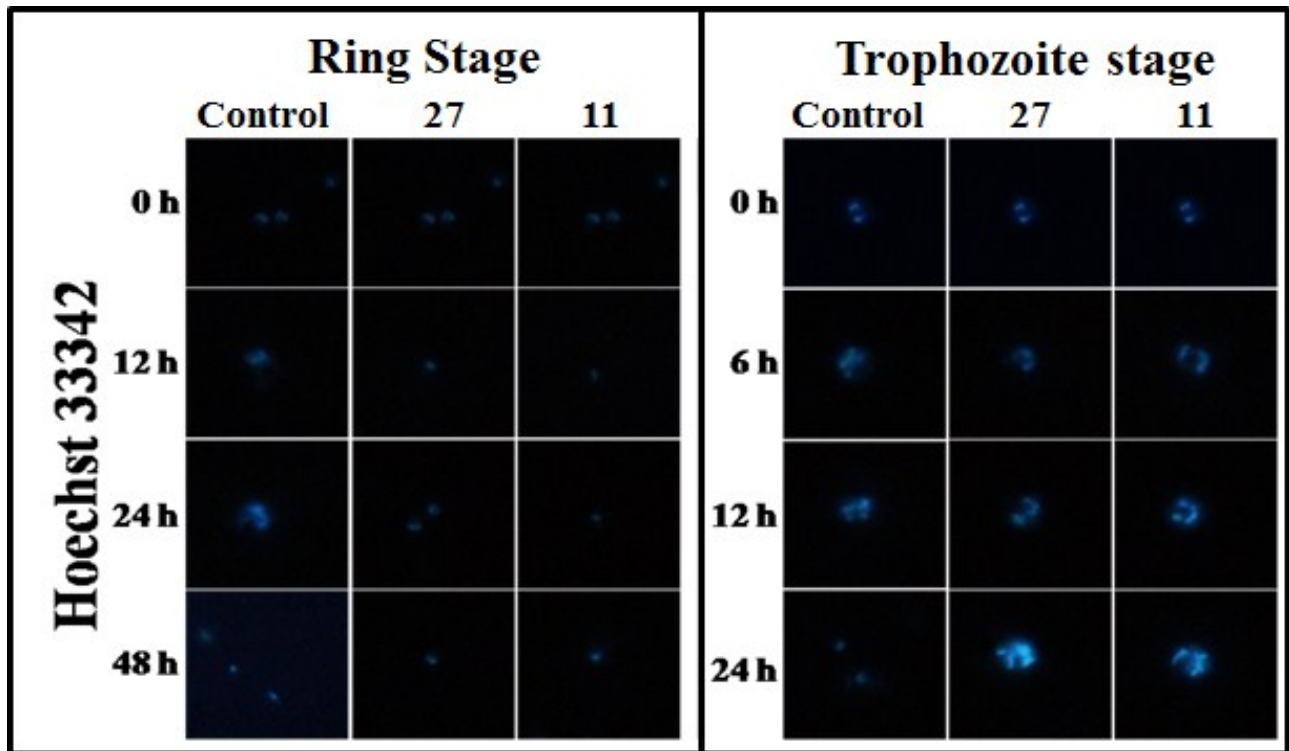

**Figure S1b:** Increased fluorescence of Hoechst 33342 in treated trophozoites (24 h) suggests DNA condensation and fragmentation in malaria parasites.

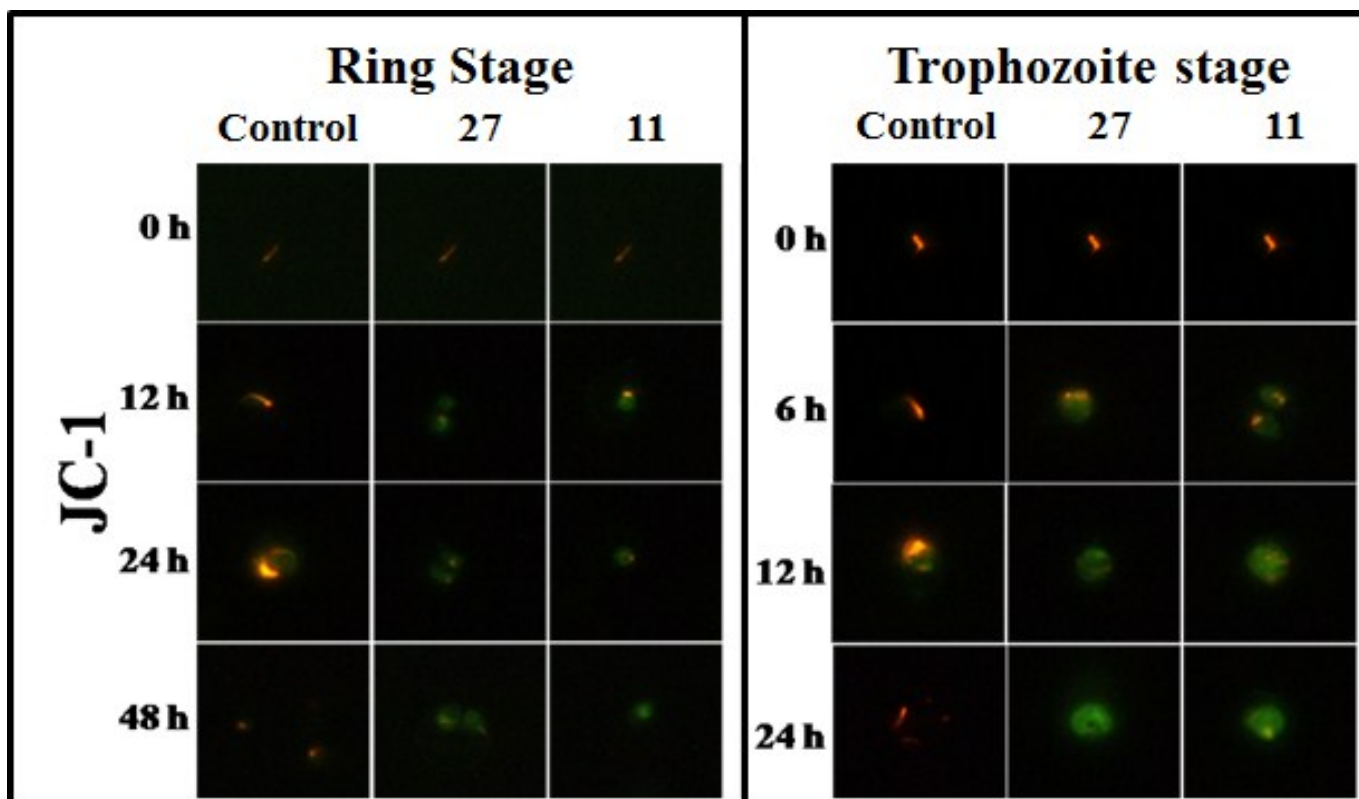

**Figure S1c:** JC-1 staining indicates loss of mitochondrial membrane potential in 27 and 11 treated ring and trophozoites stages.

#### References

1. A. Sharma, N. Sharma, R. Kumar, A. Shard, A. K. Sinha, *Chem. Commun.* 2010, **46**, 3283.
2. A. K. Sinha, V. Kumar, A. Sharma, A. Sharma, *Tetrahedron* 2007, **63**, 11070.
3. N. Sharma, A. Sharma, A. Shard, R. Kumar, Saima, A. K. Sinha, *Chem. Eur. J.* 2011, **17**, 10350.
4. M. Yamashita, K. Hirano, T. Satoh, M. Miura, *Chem. Lett.* 2010, **39**, 68.
5. M. Chalal, D.-F. Vervandier, P. Meunier, H. Cattey, J.-C. Hierso, *Tetrahedron* 2012, **68**, 3899.
6. Y. Wang, C. A. Mathis, G.-f. Huang, D. P. Holt, M. L. Debnath. W.E. Klunk, *J Label Compd. Radiopharm* 2002, **45**, 647.
